# Supplementary material
Source: MDPI journal article supplement (https://www.mdpi.com/2073-4395/12/2/290)
Supplement: s1 [file s1]

# The physiological role of inulin in wild cardoon (*Cynara cardunculus* L. var. *sylvestris* Lam.)

Ferdinando Branca <sup>1</sup>, Sergio Argento <sup>2</sup>, Anna Maria Paoletti<sup>3</sup> and Maria Grazia Melilli<sup>2\*</sup>

Supplementary data

**Table S1.** Pearson product moment correlation coefficient ( $r^2$ ) among sugars and enzymes in roots of wild cardoon. \*\*\*, \*\*and \* indicate significant at  $p < 0.001$ , 0.05 and 0.01, respectively, and ns not significant

|                    | Glucose | Fructose        | Sucrose | Inulin  | 1-SST    | 1-FFT     | 1-FEH    | Invertase |
|--------------------|---------|-----------------|---------|---------|----------|-----------|----------|-----------|
| Vegetative phase   |         |                 |         |         |          |           |          |           |
| Glucose            |         | ns <sup>1</sup> | ns      | 0.624*  | ns       | ns        | ns       | 0.760**   |
| Fructose           |         |                 | ns      | ns      | ns       | ns        | ns       | ns        |
| Sucrose            |         |                 |         | 0.727** | 0.920*** | -0.843*** | 0.731**  | ns        |
| Inulin             |         |                 |         |         | 0.727**  | 0.785**   | ns       | ns        |
| 1-SST              |         |                 |         |         |          | -0.888*** | 0.717*** | ns        |
| 1-FFT              |         |                 |         |         |          |           | -0.653*  | ns        |
| 1-FEH              |         |                 |         |         |          |           |          | ns        |
| Invertase          |         |                 |         |         |          |           |          |           |
| Reproductive phase |         |                 |         |         |          |           |          |           |
|                    | Glucose | Fructose        | Sucrose | Inulin  | 1-SST    | 1-FFT     | 1-FEH    | Invertase |
| Glucose            |         | ns              | -0.764* | ns      | 0.989*** | ns        | 0.986*** | 0.897**   |
| Fructose           |         |                 | 0.900** | ns      | ns       | ns        | ns       | ns        |
| Sucrose            |         |                 |         | 0.800*  | ns       | ns        | -0.708*  | ns        |
| Inulin             |         |                 |         |         | -0.706*  | ns        | -0.733*  | ns        |
| 1-SST              |         |                 |         |         |          | ns        | 0.998*** | 0.927***  |
| 1-FFT              |         |                 |         |         |          |           | -0.726*  | ns        |
| 1-FEH              |         |                 |         |         |          |           |          | 0.909**   |
| Invertase          |         |                 |         |         |          |           |          |           |
